# Supplementary material
Source: PubMed Central journal article supplement (PMC7669742)
Supplement: NIHMS1631838-supplement-1.pdf [file NIHMS1631838-supplement-1.pdf]

**Figure S1**

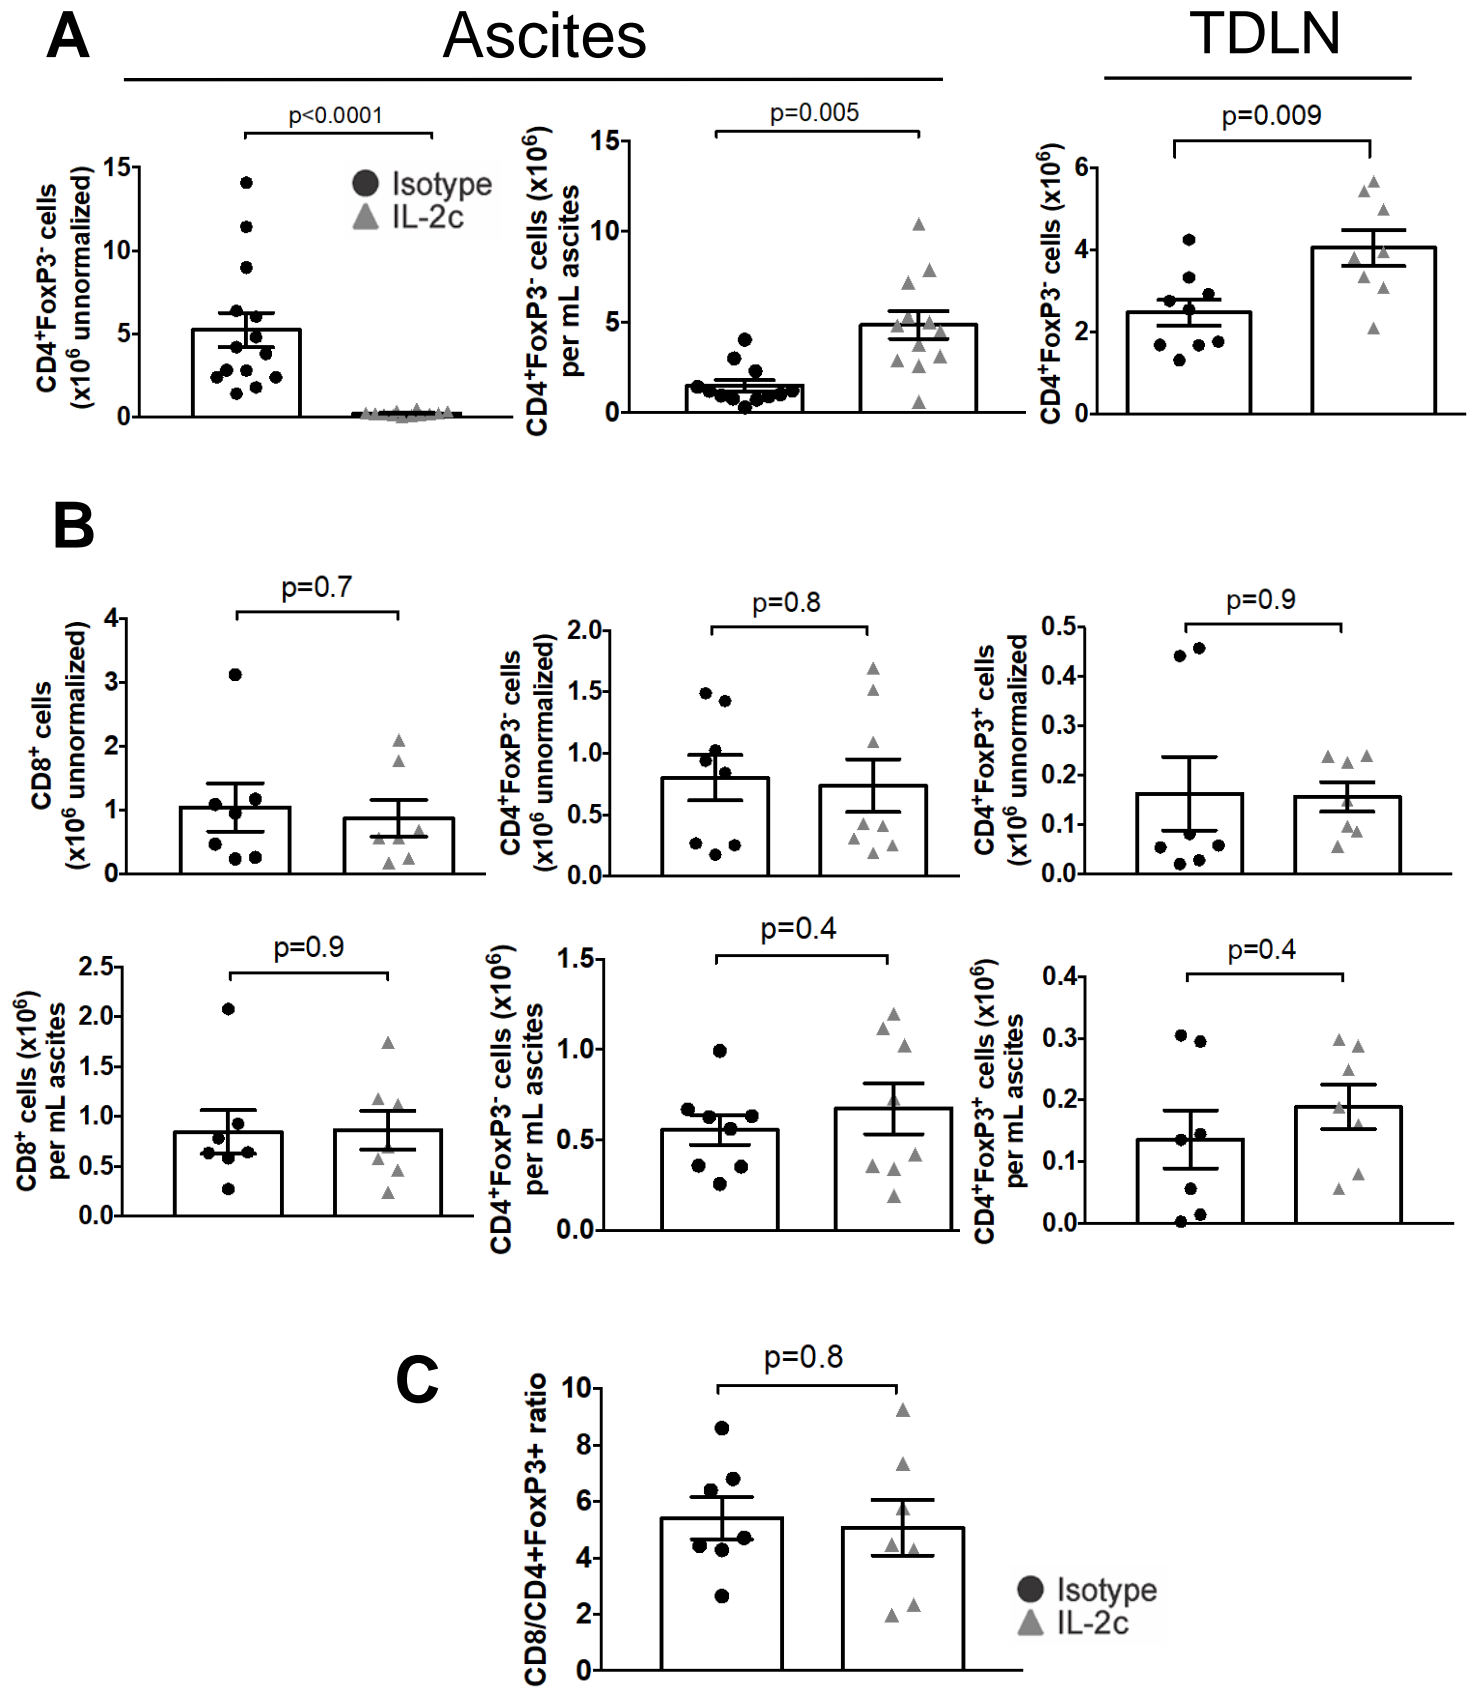

**Figure S1. IL-2c increases conventional CD4 T cell in ascites three weeks after final IL-2c, but does not affect ascites Treg and effector T cell numbers at one week after final IL-2c administration.** **A.** Absolute numbers of CD4<sup>+</sup> FoxP3<sup>+</sup> Tregs in ascites either raw (left) or normalized to ascites volume (middle) and in TDLN (right) isolated three weeks after final IL-2c dose. **B.** Numbers of CD8<sup>+</sup> (left), CD4<sup>+</sup>FoxP3<sup>-</sup> (middle) and CD4<sup>+</sup>FOXP3<sup>+</sup> (right) Tregs either raw (top) or normalized to ascites volume (bottom) isolated one weeks after final IL-2c dose. **C.** CD8<sup>+</sup>/CD4<sup>+</sup>FoxP3<sup>+</sup> ratios were calculated one weeks after final IL-2c dose.

**Figure S2**

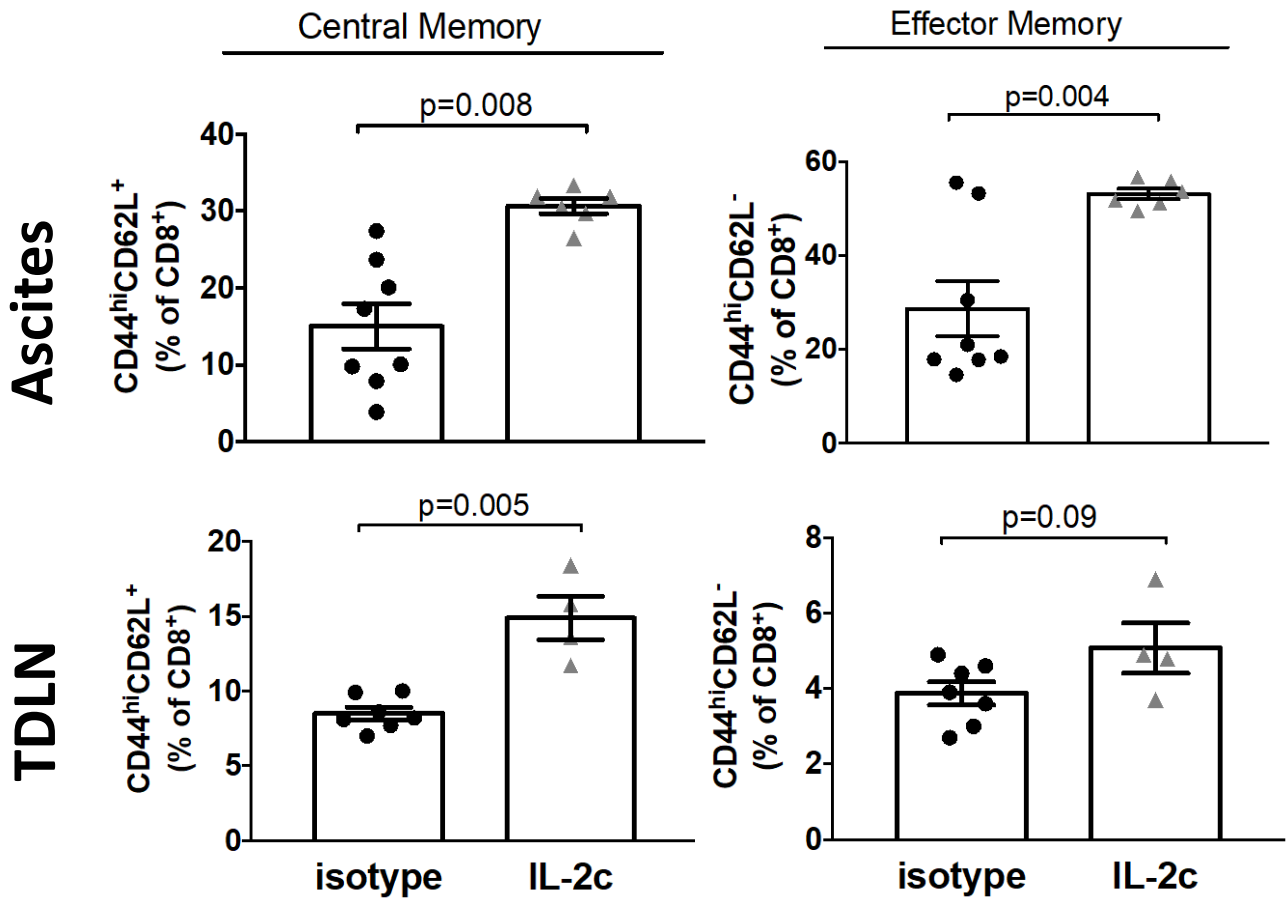

**Figure S2. IL-2c treatment increases CD8<sup>+</sup> central and effector memory T cells in the ascites, and central memory T cells in TDLN.** Mice were challenged with ID8agg-Luc, ± IL-2c and sacrificed three weeks after final IL-2c dose. CD44<sup>hi</sup>CD62L<sup>+</sup> (left) and CD44<sup>hi</sup> CD62L<sup>-</sup> (right) cells in ascites (top) and TDLN (bottom) were determined by flow cytometry.

**Figure S3**

— isotype — IL-2c

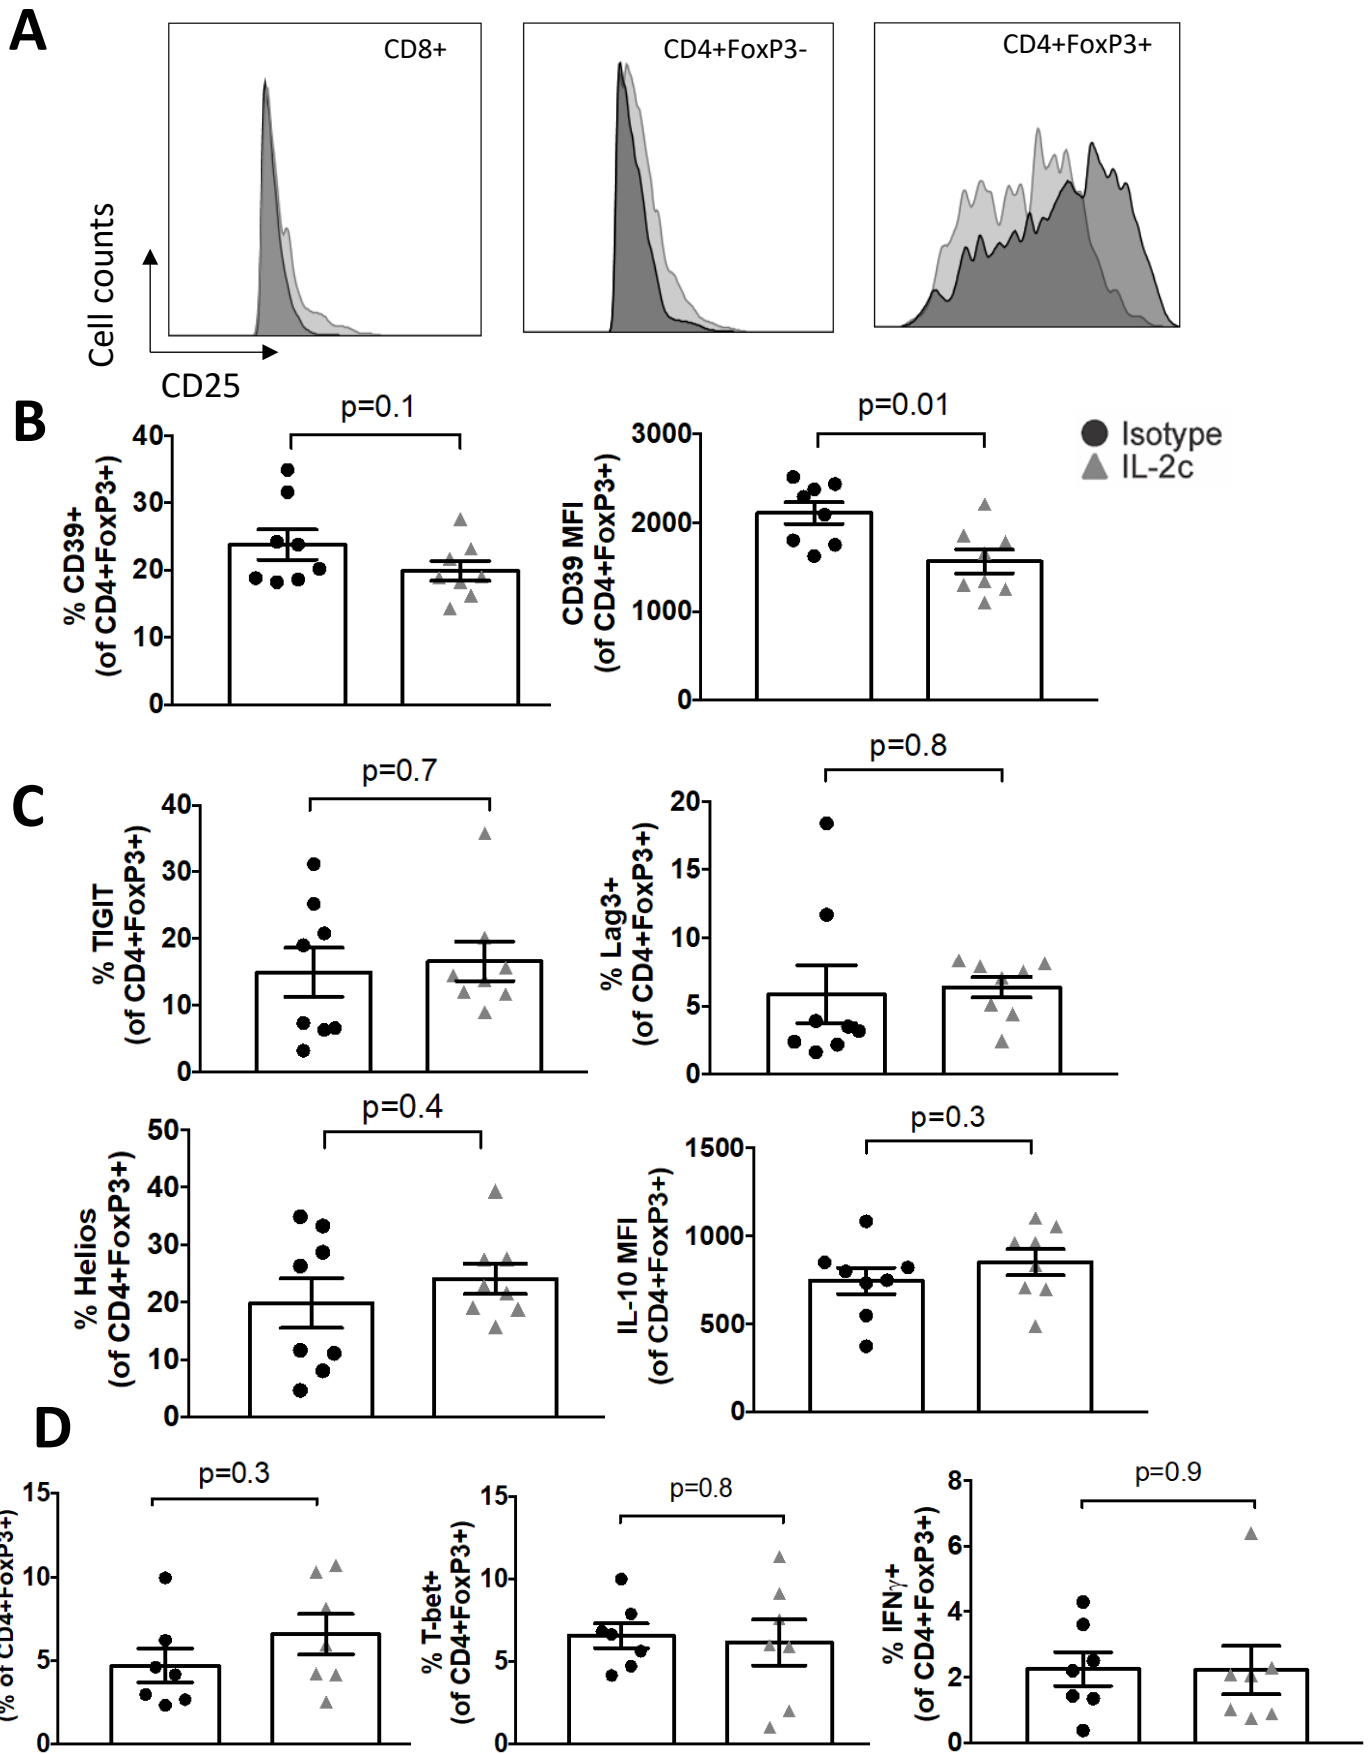

**Fig S3. Additional Treg phenotype in ascites and TDLN after IL-2c treatment. A.** Histogram overlay of CD25 expression in CD8<sup>+</sup> (left), CD4<sup>+</sup>FoxP3<sup>-</sup> (middle) and CD4<sup>+</sup>FoxP3<sup>+</sup> (right) in ascites plotted from Fig 3B. **B.** Summary graph of CD39 prevalence (left) and MFI (right) in ascites CD4<sup>+</sup>FoxP3<sup>+</sup> cells. **C.** Summary graph of TIGIT, Lag3, Helios prevalence and IL-10 MFI in ascites CD4<sup>+</sup>FoxP3<sup>+</sup> cells. **D.** Summary graph of PD-1, T-bet and IFN $\gamma$  prevalence in TDLN CD4<sup>+</sup>FoxP3<sup>+</sup> cells. P value determined by unpaired Student *t*-test.

**Figure S4**

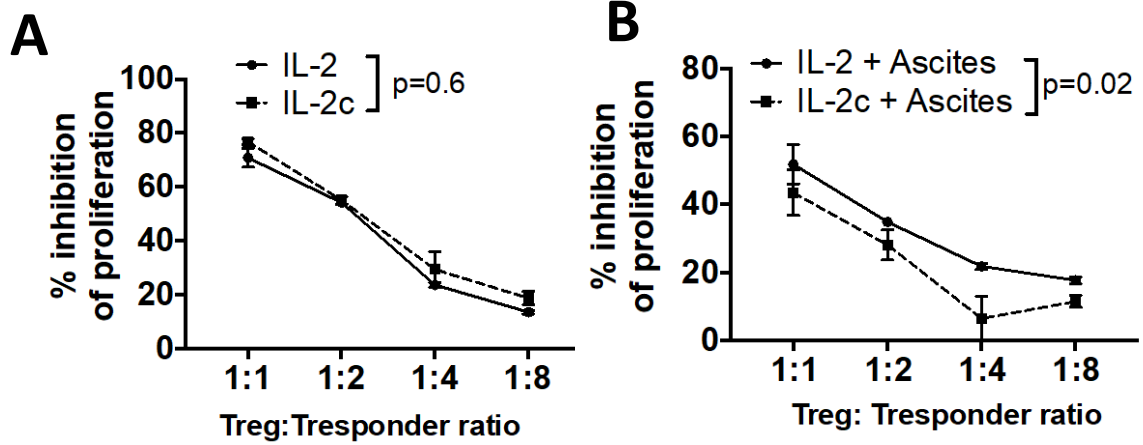

**Fig S4. IL-2c directly inhibits Treg suppression specifically in the tumor microenvironment.** CD4<sup>+</sup>FoxP3<sup>+</sup> Tregs were sorted from naïve FIR mice and cultured *ex vivo* without (**A**) or with (**B**) 50% ascites in complete medium for 5 days followed by suppression assay. P value determined by two-way ANOVA.

## Figure S5

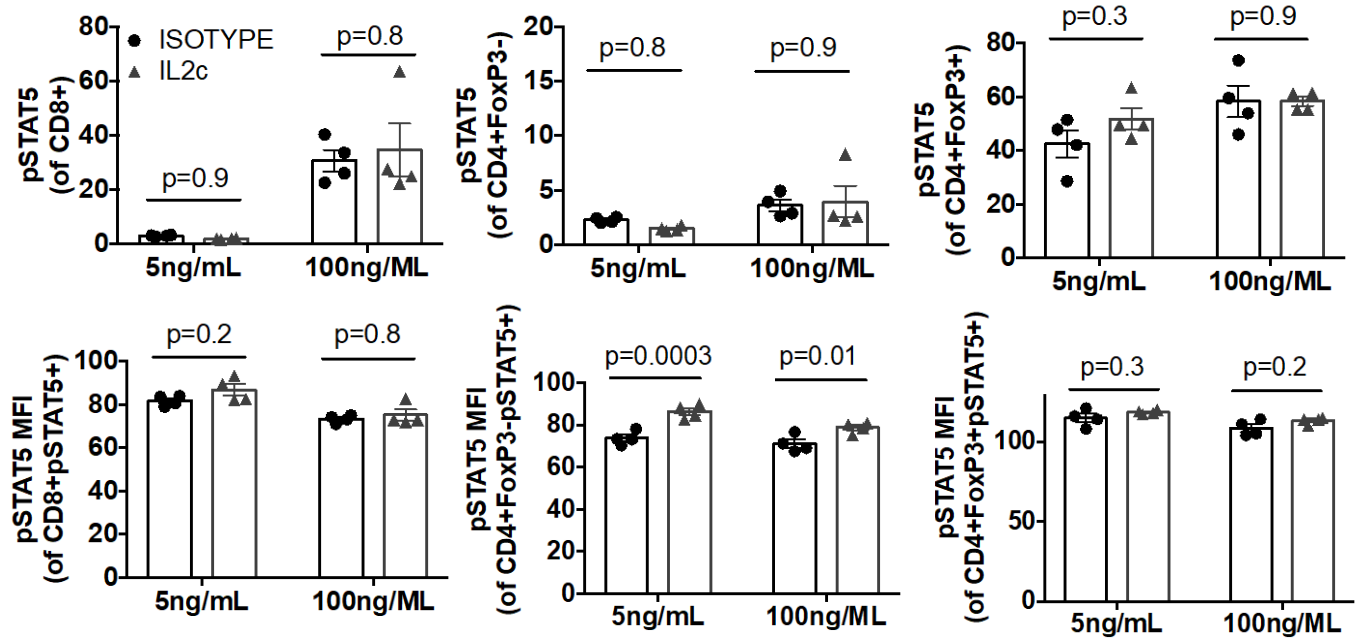

**Fig S5. IL-2 signaling is not impaired in TDLN after IL-2c treatment.** WT challenged with ID8agg were treated with isotype control or IL-2c. CD3+ T cells were sorted from TDLN 3 weeks after last IL-2c dose, stimulated with 5ng/mL or 100ng/mL mouse IL-2 for 30 minutes and assessed by flow cytometry.

**Figure S6**

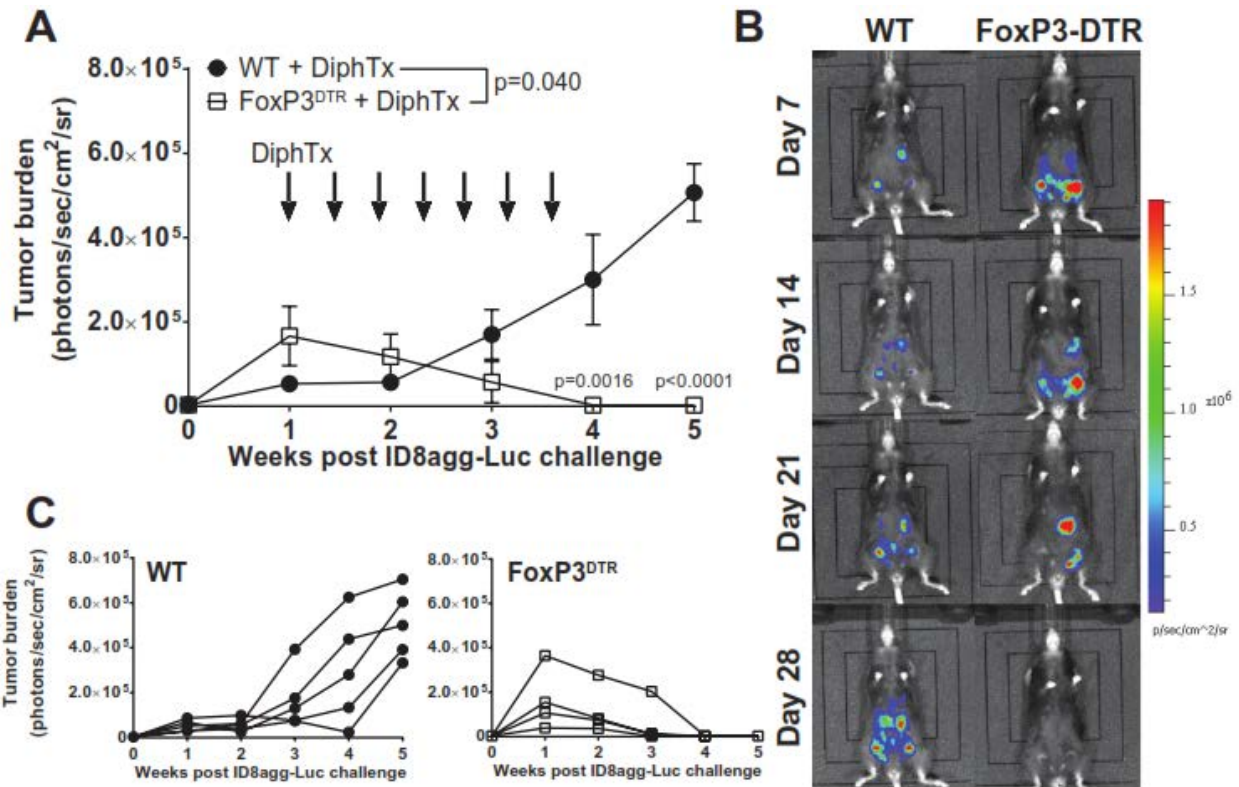

**Figure S6. Specific Treg depletion is highly effective against ID8agg.** **A.** ID8agg-Luc tumor burden after administration of diphtheria toxin (DiphTx) as indicated (arrows). **B.** Representative bioluminescent images from **A.** **C.** Individual tumor growth curves from **A.** P values determined by two-way ANOVA.



# Figure S7

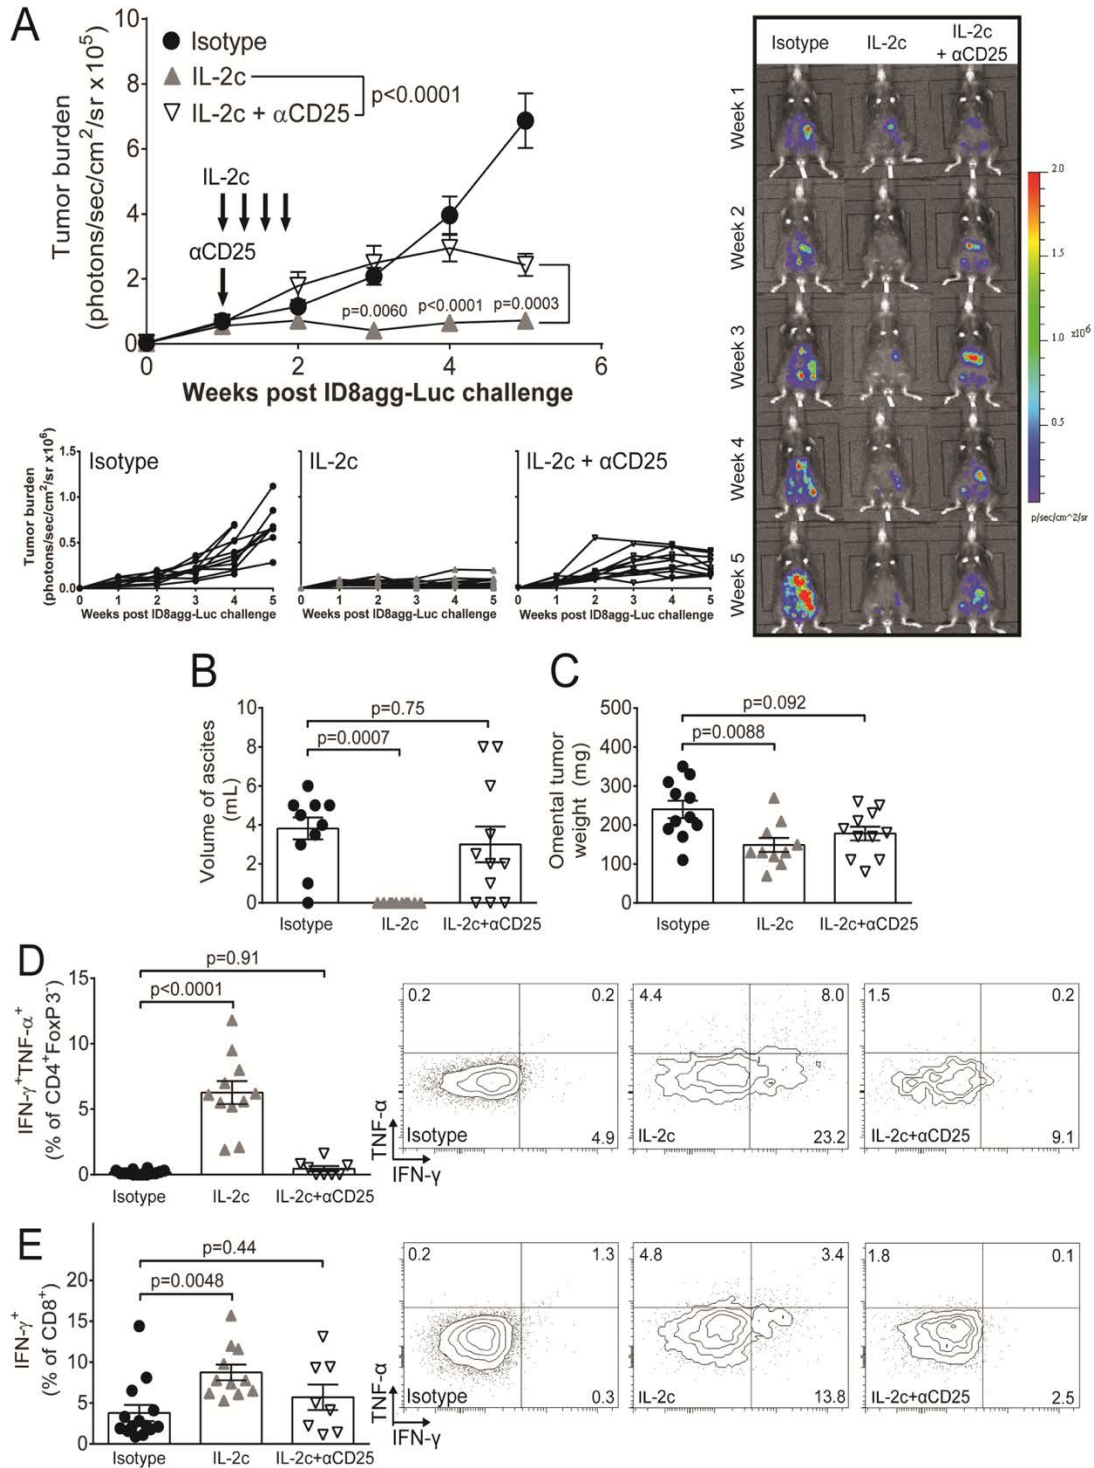

**Figure S7.  $\alpha$ CD25 attenuates IL-2c-induced tumor rejection and T cell function in ID8agg OC.** **A.** Tumor burden by bioluminescence after challenge with ID8agg-Luc and IL-2c treatment as indicated (black arrows) (top left), with representative images of ID8agg-Luc-bearing mice  $\pm$  IL-2c or  $\alpha$ CD25 (right) and individual tumor growth curves (bottom). **B.** Omental tumor weight 3 weeks after the last IL-2c. **C.** Ascites volume 3 weeks after the last IL-2c. **D.** Summary graph of ascites CD45<sup>+</sup>CD3<sup>+</sup>CD4<sup>+</sup>FoxP3<sup>-</sup> IFN- $\gamma$ <sup>+</sup>TNF- $\alpha$ <sup>+</sup> T cell frequency 3 weeks after IL-2c (left) with representative flow plots (right). **E.** Summary graph of ascites CD45<sup>+</sup>CD3<sup>+</sup>CD8<sup>+</sup> IFN- $\gamma$ <sup>+</sup>TNF- $\alpha$ <sup>+</sup> T cell frequency 3 weeks after the last IL-2c (left) with representative flow plots (right). All *p* values from one-way ANOVA with *post hoc* Sidak's test, except **A** (two-way repeated measures ANOVA (figure legend) with *post hoc* Sidak's test (graph points)). N=10 for isotype, 10 for IL-2c, 8-13 for IL-2c +  $\alpha$ CD25 for all panels. All data are from two pooled independent experiments. The datasets for control and IL-2c-treated mice used here are also used in **Fig 1**.

# Figure S8

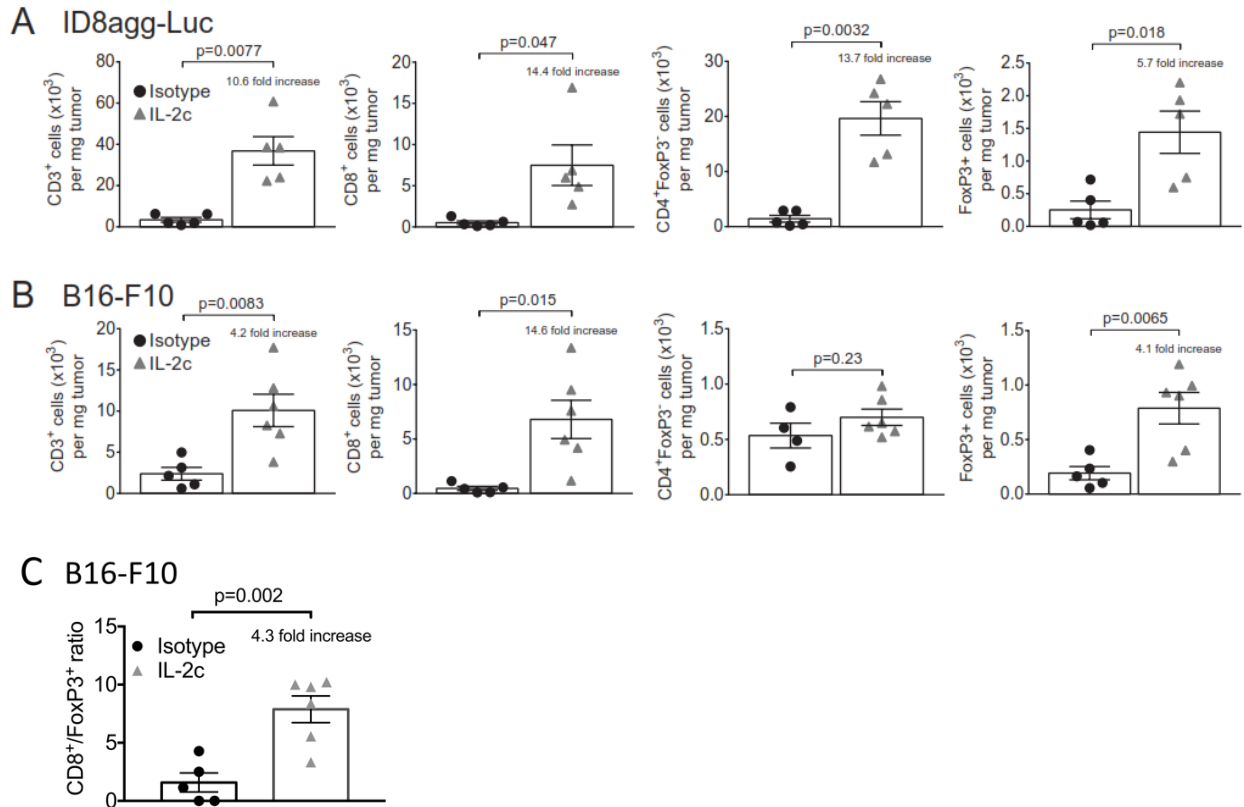

**Figure S8. IL-2c promotes intratumoral T cell infiltration. A.** Absolute numbers of ID8agg intratumoral T cell subsets normalized to tumor weight 12 days after the final IL-2c dose. **B.** Absolute numbers of B16-F10 intratumoral T cell subsets normalized to tumor 1 day after the final IL-2c dose. Data from one experiment representative of many with similar results. N=4-5/group. **C.** CD8<sup>+</sup>/Treg<sup>+</sup> ratio of B16-F10 tumors 1 day after the final IL-2c dose.

# Figure S9

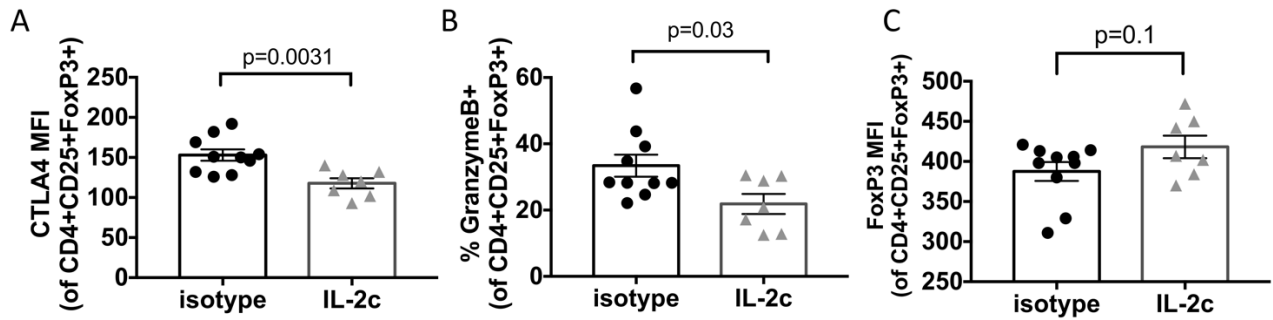

**Figure S9. IL-2c reduces intratumoral Treg activation and functional molecules in B16 melanoma.** CTLA-4 (A) and Granzyme B (B) and FoxP3 (C) expression in intratumoral CD45<sup>+</sup>CD3<sup>+</sup>CD4<sup>+</sup>CD25<sup>+</sup>Foxp3<sup>+</sup> Tregs in B16 tumors by flow cytometry after IL-2c treatment one day after final IL-2c treatment. N=7-10 per group.

## Figure S10

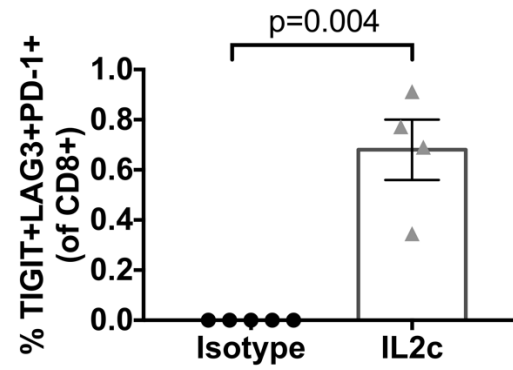

**Figure S10. IL-2c increases TIGIT+LAG-3+PD-1+ CD8+ T cells in B16 tumors.** TIGIT+LAG-3+PD-1+ prevalence among CD45+CD3+CD8+ T cells in B16 tumors one day after last IL-2c dose by flow cytometry. N=4-5 per group.
